# Supplementary material for: Monitoring Genetic Erosion of Aromatic and Medicinal Plant Species in Alentejo (South Portugal)
Source: MDPI journal article supplement (doi:10.3390/plants12142588), 2023-07-08
Supplement: s1 [file s1]

**Table S1.** Survey formulary used during 2011 resampling missions for each cultivated accession.

|                                           |              |
|-------------------------------------------|--------------|
| Plant species                             | CS, MC or MP |
| Accession code                            | *            |
| GPS coordinates                           |              |
| 1.1 – Finding the person (farmer)         |              |
|                                           | Yes          |
|                                           | No           |
| 1.2 - If not:                             |              |
|                                           | Died         |
|                                           | Migrated     |
| 2.1 – Continue to use the plant?          |              |
|                                           | Yes          |
|                                           | No           |
| 2.2 If not:                               |              |
| for how many years ago (n. <sup>o</sup> ) |              |
| lost the seed                             |              |
| abandoned the activity                    |              |
| buy the seed                              |              |
| buy the plant                             |              |
| causes (text)                             |              |
| gave seed to neighbours (yes)             |              |
| Field notes                               |              |

CS - *Coriandrum sativum*, MC- *Mentha cervina*, MP - *Mentha pulegium*, \* 2002/2003 field missions: 28 accessions of MC; 19 accessions of MP; 30 accessions of CS plus 18 accessions (from a total of 34) collected previously from BPGV – Portuguese Plant Germplasm Banc.

**Table S2.** Survey formulary used during 2011 resampling missions for each wild species accession.

|                                              |                              |
|----------------------------------------------|------------------------------|
| Plant species                                | MC or MP                     |
| Accession code                               | *                            |
| GPS coordinates                              |                              |
| 3.1 - Accession remains in the same location |                              |
|                                              | Yes                          |
|                                              | No                           |
| 3.2 - relative abundance                     |                              |
|                                              | maintenance                  |
|                                              | reduction                    |
|                                              | increase                     |
| 3.3 - Genetic erosion causes                 |                              |
|                                              | river cleaning               |
|                                              | habitat destruction          |
|                                              | invasive by weeds            |
|                                              | mechanization and herbicides |
|                                              | grazing                      |
|                                              | overharvest                  |
|                                              | desertification              |
|                                              | Field notes                  |

MC- *Mentha cervina*, MP - *Mentha pulegium*, \* MC with 6 wild accessions; MP with 22 locations.  
 Note: some MP locations had cultivated and also wild plants nearby.
